# Supplementary material for: An Efficient Clustered Regularly Interspaced Short Palindromic Repeat (CRISPR)/CRISPR-Associated Protein 9 Mutagenesis System for Oil Palm (Elaeis guineensis)
Source: PubMed Central journal article supplement (PMC8647858; doi:10.3389/fpls.2021.773656), 2021-11-22
Supplement: Data_Sheet_1.pdf [file Data_Sheet_1.pdf]

## Supplementary Material

### Data Sheet S1. Sequence of codon optimized *SpCas9* gene

>Codon optimized SpCas9

```
ATGGATAAGAAGTACTCAATCGGCTCGATATCGGTACAAACAGCGTTGGCTGGGCCGTTATCACCGACGAATATAAGGTCCGAGCAAGAAGT
TCAAGGTTCTGGGAAACACCGACAGGCACAGCATCAAGAAGAATCTTATAGGGGCTCTCCTTTTCGATAGTGGAGAGACTGCTGAGGCGACCCG
TCTCAAGAGGACCGCTCGTAGGAGGTACACCCGTCGGAAGAATCGTATCTGTACCTCCAGGAGATCTTCTCAAATGAGATGGCCAAGGTAGAT
GACAGCTTCTTCCACCGACTTGAAGAGTCTTCTCCTCGTGGAAAGAGACAAGAAGCATGAGCGTCACCCCTATCTTCCGAAACATAGTAGATGAGG
TTGCTTACCATGAGAAGTACCCAATCTACCACCTTCGAAAGAAGTTGGTTGATTCCACCGACAAGGCGGATCTCCGCTTATCTACTTGGC
CTTAGCTCATATGATCAAGTTCGGTGGCCACTTCTTGATCGAGGGCGATTAAACCCAGATAATAGCGATGTTGATAAGCTATTCATCCAGCTC
GTGCAGACCTACAATCAGTTATTTCGAGGAGAACCCTATCAACGCAAGCGGAGTTCGATGCAAAGCGGATCTTCTGCCCCACTCAGCAAGTCCA
GACGACTCGAAGCTCATCGCTCAGCTCCAGGTGAGAAGAAGAAGCGGCTTATTCGAAATCTCATCGCACTCTCATTTGGGACTCACCCCTAA
CTTCAAGTCAAATTCGACTTGGCCGAGGATGCTAAGTTACAGCTCTCCAAGGATACCTACGATGACGATCTCGACAACCTCTTGGCGCAGATC
GGTGACCAGTACGCTGATTTGTTCTCGCCGCTAAGAATCTTTCAGATGCTATCTCCTTCCGACATCTCAGGGTCAACACCGAGATCACCA
AGGCCCACTCAGCGCTTCCATGATCAAGCGCTACGATGAGCATCACCAGGACTTGACCTCCTTAAGGCATTAGTTCGACAGCAGCTCCCTGA
GAAGTACAAAGGATCTTCTTCGACCAGTCAAAGAACGGGTACGAGGTTACATCGATGGGGGAGCTAGCCAGGAGGAGTCTACAAAGTTATC
AAGCCAATCTTAGAGAAGATGGATGGAACCGAGGAGTTATTTGGTGAAGCTCAATCGTGAGGATCTCCTTCGCAAGCAGAGGACCTTCGACAACG
GCTCTATCCCACATCAGATCCACTTGGGAGAGCTTCATGCCATCTTGAGGAGGCGAGGAGATTCTACCCTTTCTTAAAGGACAACCGTGAGAA
GATCGAGAAGATCTTGACCTTCCGAATCCATACGTCGCGGCTCTCGCACGTTGGCAATAGCCGTTTCGCATGGATGACCCGGAAGTCCGAG
GAGACTATCACCCATGGAATTCGAGGAGGTGGTCGACAAGGGTGCTTCAGCACAGTCTTCATCGAGCGCATGACCAATTCGATAAGAACC
TTCCAAATGAGAAGGTGCTCCCTAAGCACAGTTTGTCTTACGAGTACTTACCCTTACACAGGTTGACCAAGGTGAAGTACGTACCAGGGG
GATGCGAAAGCCTGCCTTCTCCTCAGGAGAGCAGAAGAAGGCTATCGTGGATTTACTTTTCAAGACCAATCGAAAGGTACCCGTTAAGCAGTTA
AAGGAGGATTACTTCAAGAAGATCGAGTCTTCGACAGCGTGGAGATCTCCGGCGTCGAGGATAGATTCAACGCTTCCCTCGAACCTACCATG
ATTTGCTAAAGATCATTAAGGACAAGGATTTCTTGATAACGAGGAGAATGAGGACATCTTAGAGGATATCGTGTAACTTACCTTGACCTTATTCGA
GGACAGGGAGATGATCGAGGAGAGGCTTAAAGACCTACGCTCACCTTTCGACGATAAGGTCATGAAGCAGCTTAAACGTCGCGCTTATACTGGT
TGGGGACGTTTGTCTCGAAAGTTGATCAATGGCATCAGGGATAAAGCAGTCTGGCAAGACCATCTTAGATTCTTGAAGTCCGACGGCTTCGCTA
ACCGCAATTTTCATGCAGTGTATCCATGACGATAGTTTGCATTCGAGGAGACATCCAGAAAGGCACAGGTGTCTGGACAGGGTGATAGTCTTCA
TGAGCACATCGCAAATAGCCGGGAGCCAGCCATCAAGAAGGATCTTACAGACCGTGAAGGTTGTGGATGAGTTGGTGAAGGTCATGGGG
CGGCACAAGCCTGAGAATATCGTATCGAGATGGCCCGTGAGAATCAGACCACCCAGAAGGGACAGAAGAATCCCGAGAGCGTATGAAGCGAA
TCGAGGAGGGCATCAAGGAGTTAGGAAGCCAGATCCTCAAGGAGCATCCTGTTGAGAACACCCAGTTGCAAAATGAAAAGCTCTACCTTTACTA
CCTCCAGAATGGAAGAGACATGTACGTGGATCAGGAGTTAGACATCAACCGTTTAAAGTACTACGATGTCGATCACATCGTGCCACAGAGCTTC
CTTAAAGGACGATTCCATCGATAATAAGGCTTAAACCGTCTGATAAGAACCCTGAAAGTCCGACAATGTTCCAAGTGAGGAGGTCGTTAAGA
AGATGAAGAATACTGGAGACAGCTCCTTAATGCAAGTTAATCACCCAGCGTAAGTTCGACAACCTAACGAAGGCTGAGCGTGGCGGCTTGAG
TGAGCTTGATAAGGCAGGCTTCATCAAGCGCCAGTTGGTTCGAGACTCGCCAGATCACCAGCATGTGGCTCAGATCTTGATAGCCGCATGAAC
ACCAAGTACGACGAAAATGATAAGCTTATCCGAGAGGTTAAGGTGATTACCTTAAAGTCTAAGTTAGTCTCCGATTTCCGAAAGGACTTCCAGT
TCTACAAAGTTCGTGAGATTAACAATTACCATCATGCTCAGATGCATACCTCAACGCAAGTGGTGGGACTGCTTTGATTAAGAAGTACCCAAA
GCTCGAGTCCGAGTTCGTGTACGGTATTACAAGGTTTACGACGTGCGTAAGATGATCGCTAAGTCCGAGCAGGAGATCGGAAAGGCAACCCT
AAGTACTTCTTACTCTAACATCATGAATTTCTTCAAGACCGAGATCACCCCTGCAAAATGGAGAGATCCGCAAGCGCCCTCTCATCGAGACTA
ACGGCGAGACTGGAGAAATGTCTGGGATAAGGGGCGAGATTTCCGCACAGTGGCCAAAGTATTGTCATGCCACAAGTGAATATCGTCAAGAA
GACCGAGGTGCAGACCGGCGGATTCAGCAAGGAGTCCATCCTTCCCTAAGAGGAACTCGGACAAGCTCATCGCCCGTAAAGAAGGATTGGGACCCA
AAGAAGTACGGGGGTTTCGATAGCCCTACGGTAGCTTACTCCGTTCTTGTGTGGCAAAGGTTGAGAAGGGGAAGTCGAAGAAGTTAAAGTCCG
TTAAGGAGTTACTTGGTATCACCATCATGGAGAGAAGCTCCTTCGAGAAGAATCCGATCGACTTCTTAGAGGCTAAGGGATATAAGGAGGTGAA
GAAGGATTTAATCATCAAGCTCCCTAAGTACAGCTCTTCGAGTTAGAGAACGGACGTAAGCGGATGCTTGAAGTCCGGGGGAGTTACAGAAG
GGAAATGAGCTCGCCCTGCAAGCAAGTACGTCAACTTCTTATACTTAGTACGCATTACGAGAAGTTGAAGGGCAGTCTTGAGGACAACGAGC
AGAAGCAGTTGTTTCGTGGAGCAGCATAAAGCACTACCTCGATGAGATCATCGAGCAGATCAGCGAGTTCTCCAAGAGGGTGTATCTTAGCAGATGC
CAATTTAGACAAGGTCCTCAGTGCATACAACAAGCATAGGGACAACCAATCCGTGAGCAGGAGAGAAATATCATCCATTTATTACGTTGACG
AATCTCGAGCTCCCGCTGCCTTCAAGTACTTCGATACAACAATTTGATCGTAAACGATATACGCTACAAAGGAGGTGTTAGATGCCACTCTCA
TCCATCAGTCCATCACTGGACTGTACGAGACACGCATTGACTTGAGTCAGCTAGGAGGTGACTAG
```
