# Supplementary material for: An Efficient Clustered Regularly Interspaced Short Palindromic Repeat (CRISPR)/CRISPR-Associated Protein 9 Mutagenesis System for Oil Palm (Elaeis guineensis)
Source: PubMed Central journal article supplement (PMC8647858; doi:10.3389/fpls.2021.773656), 2021-11-22
Supplement: Data_Sheet_2.pdf [file Data_Sheet_2.pdf]

## SUPPLEMENTARY MATERIAL

**Table S1.** sgRNAs for *EgPDS* and *EgBRI1* genes

| Gene          | sgRNA | Guide sequence        | PAM | Position | GC% |
|---------------|-------|-----------------------|-----|----------|-----|
| <i>EgPDS</i>  | gPDS1 | AATTGTGCACGGCCGAGTAA  | AGG | 321      | 50  |
|               | gPDS2 | TACTCTCTTGGCATAGATTC  | TGG | 102      | 40  |
|               | gPDS3 | TTGTCTGCATGGACTATCCA  | AGG | 238      | 45  |
|               | gPDS4 | GCAGCTTGGGAAGGATGAAGA | TGG | 444      | 50  |
|               | gPDS5 | GCTTGCCCCCAACCATGGC   | AGG | 720      | 70  |
| <i>EgBRI1</i> | gBRI1 | TACAGTCCCCGAGCTCCGGC  | GGG | 1857     | 70  |
|               | gBRI2 | CTGGGCCACAATATGCTCTC  | CGG | 2026     | 55  |
|               | gBRI3 | GGATCGGCCGGCTCGGCAAT  | AGG | 1406     | 70  |
|               | gBRI4 | ACCTCGCAGGTAATGGCCTC  | GGG | 409      | 60  |
|               | gBRI5 | TTCGAGACTCTAGTCTCTTC  | GGG | 886      | 45  |

**Table S2.** Primers used for molecular confirmation of gene editing event

| Gene          | sgRNA | Forward Primer Sequence | Reverse Primer Sequence |
|---------------|-------|-------------------------|-------------------------|
| <i>EgPDS</i>  | gPDS1 | GACTATCCAAGGCCTGAACT    | GCAAGATATTTTGCTGTAGA    |
|               | gPDS2 | ATACCATTGGATTTATCTCC    | GGCTTGATCTTGTTCTTTG     |
|               | gPDS3 | TAGCGAGTTTATGGGTTGCC    | GACAGTATTCTCAAGTTCAG    |
|               | gPDS4 | ACCACCTTCTCAAATGGCT     | TGATGATCGGCACATGAGGA    |
|               | gPDS5 | AGGCATCATCCTGCTGACAT    | TGGCCAACCATCATGTTCTCA   |
| <i>EgBRI1</i> | gBRI1 | CTCGATCTCTTTACAACCA     | TCCAAGACACCAACATAGTG    |
|               | gBRI2 | CGAAGGTCCGATCCCAGCTT    | TGCCATTAGCACTCTGTCCA    |
|               | gBRI3 | CCTCAGCAACTGCACCGATT    | GGAGAAAGAATTGTTCCCGA    |
|               | gBRI4 | GCCAACCTCACCGGAAATAT    | AGTTGCCGGAGAGATTGAGG    |
|               | gBRI5 | CTACCTGAACCTCTCTGCCA    | AGGGGCCAGAGAAGTTGTT     |

**Table S3.** Primers for PCR confirmation of transgene

| Gene        | Forward Primer Sequence | Reverse Primer Sequence |
|-------------|-------------------------|-------------------------|
| <i>Cas9</i> | AGAATCTTAGCGATGCTATCCT  | ACCTGCTATTACCCCTTGCG    |
| <i>OsU3</i> | AGGCGTCTTCTACTGGTGCT    | CGAACAGGCTTATGTCCACT    |
